# Supplementary material for: Wrinkled Thermo-Electric Meander-Shaped Element on a Thin Freestanding PDMS Membrane
Source: MDPI journal article supplement (doi:10.3390/membranes13050508), 2023-05-11
Supplement: s1 [file s1]

## Supplementary Information

# Wrinkled Thermo-Electric Meander-Shaped Element on a Thin Freestanding PDMS Membrane

Liubov Bakhchova <sup>\*,†</sup>, Liudmila Deckert <sup>†</sup> and Ulrike Steinmann

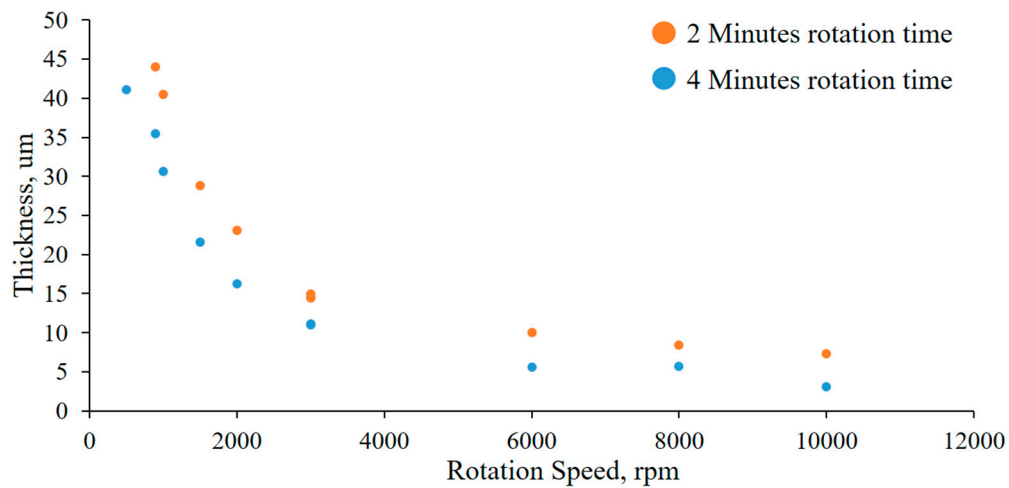

**Figure S1.** PDMS membrane thickness vs. rotation speed at different rotation time (2 and 4 minutes) for solution of PDMS pre-polymer with a curing agent (10 : 1 w/w mixing ratio). Silicone is spin-coated on the silicon wafer with prepared 2,5  $\mu\text{m}$  photoresist sacrificial layer.

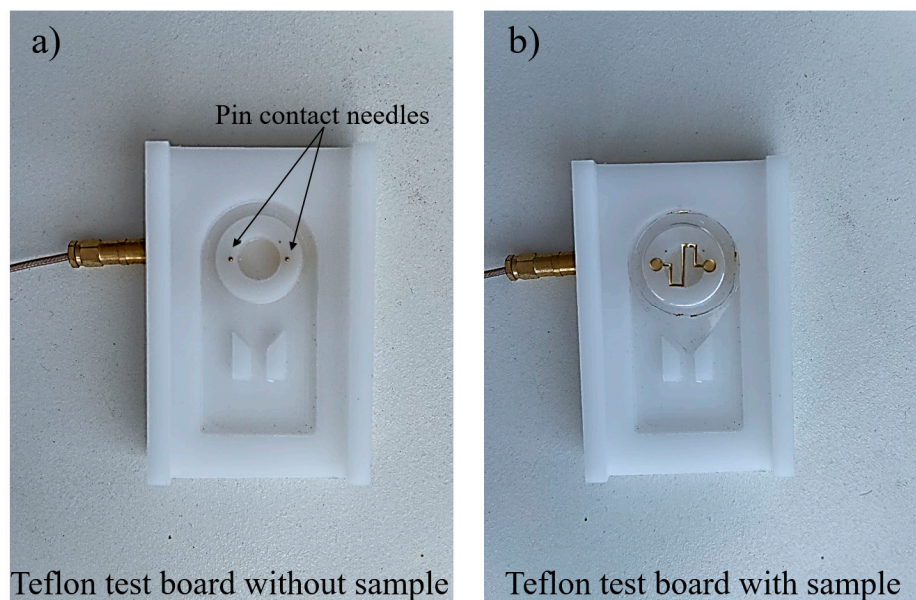

**Figure S2.** Photographs of the Teflon test board for resistance and temperature measurements (a) without sample on it and (b) – with.

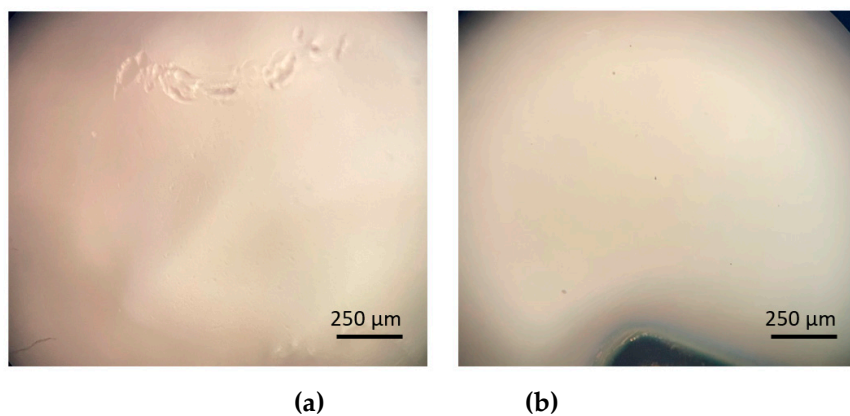

**Figure S3.** – Optical microscope images of the PDMS surface before oxygen plasma treatment (a) and after (b).

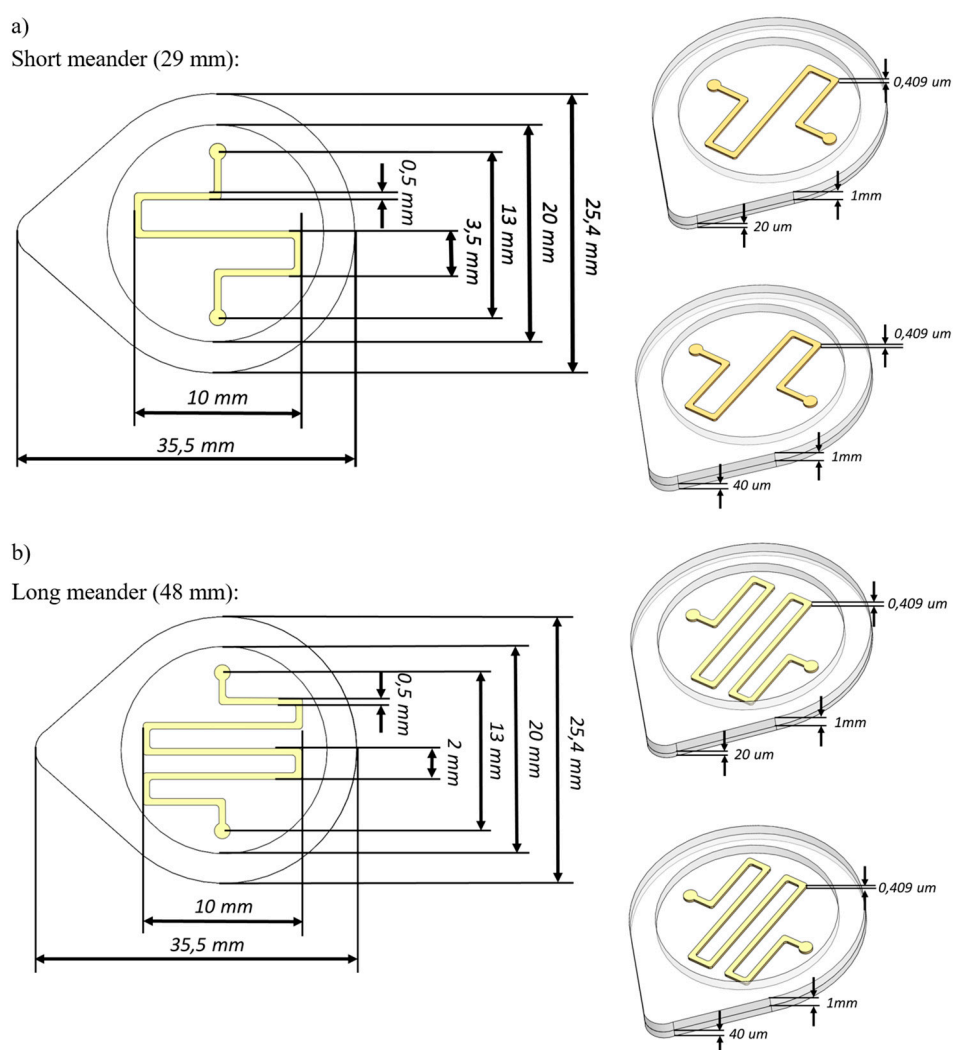

**Figure S4.** – Schematic representation of the obtained samples dimensions. In (a) the short (29 mm) and (b) the long (48 mm) meanders are shown (2D sketch and 3D visualization on 20  $\mu\text{m}$  and 40  $\mu\text{m}$  thick PDMS membrane).

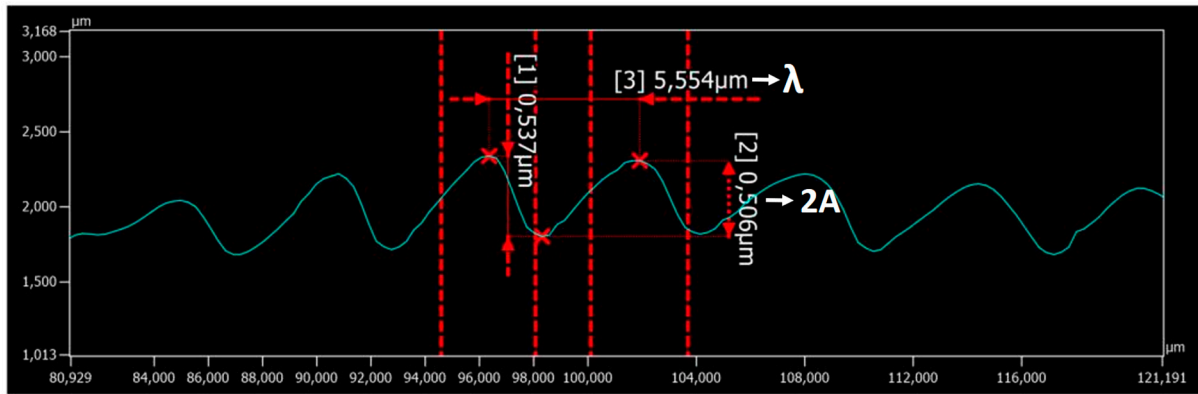

**Figure S5.** – The graph representing the profile measurements by Profilometer Keyence VK-X3000.

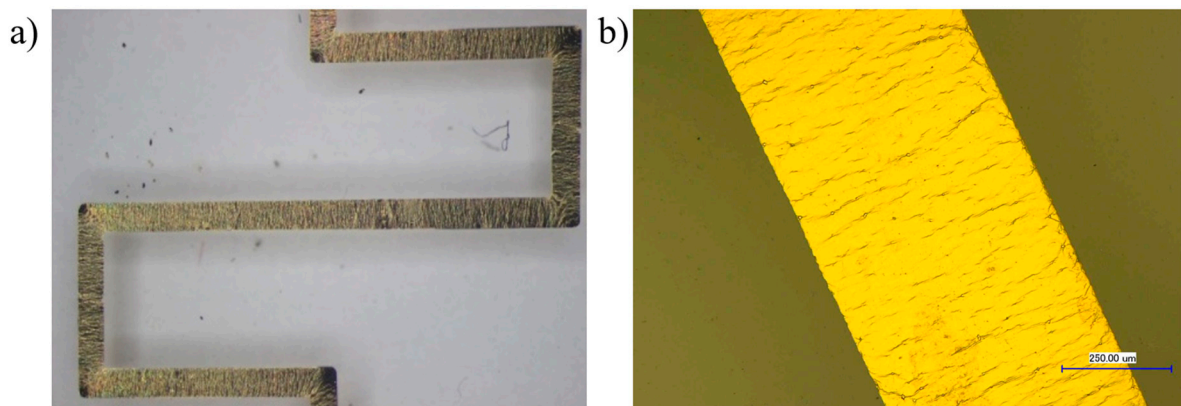

**Figure S6.** – Cr/Au meander shaped element on the 1 mm thick PDMS layer (a), with one-directional wrinkle pattern of the wire (b).



a) 10:1 Contact pad

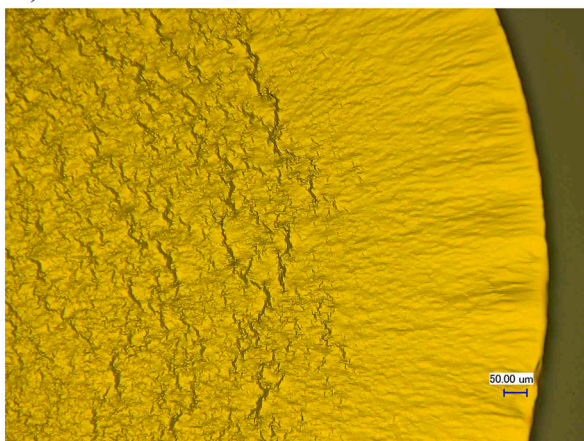

b) 10:4 Contact pad

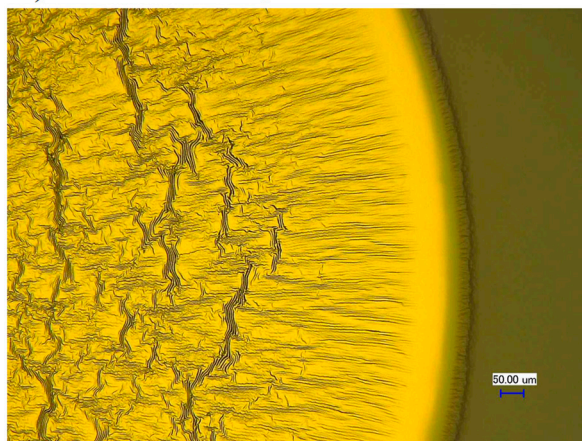

c) 10:1

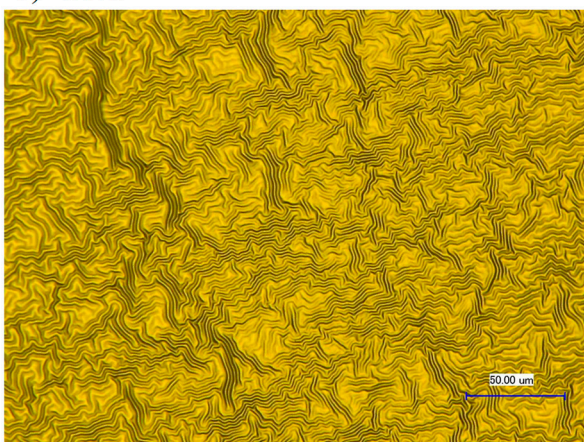

d) 10:4

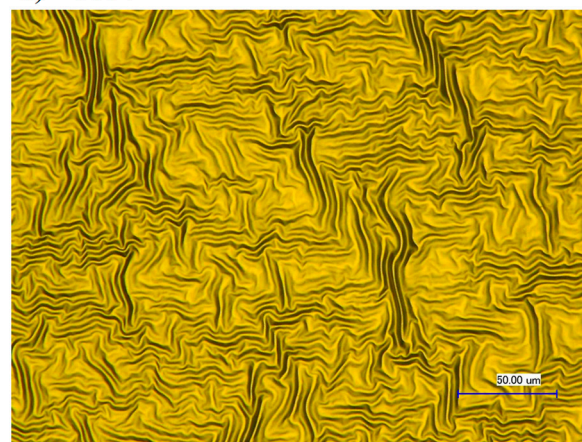

**Figure S7.** – Wrinkled contact pad surface of the developed meander-shaped element on 40  $\mu\text{m}$  PDMS membrane, for the mixing ratio a, c) 10:1 and b, d) 10:4. The c) and d) present the magnified area in the middle of the contact pads shown in a) and b).

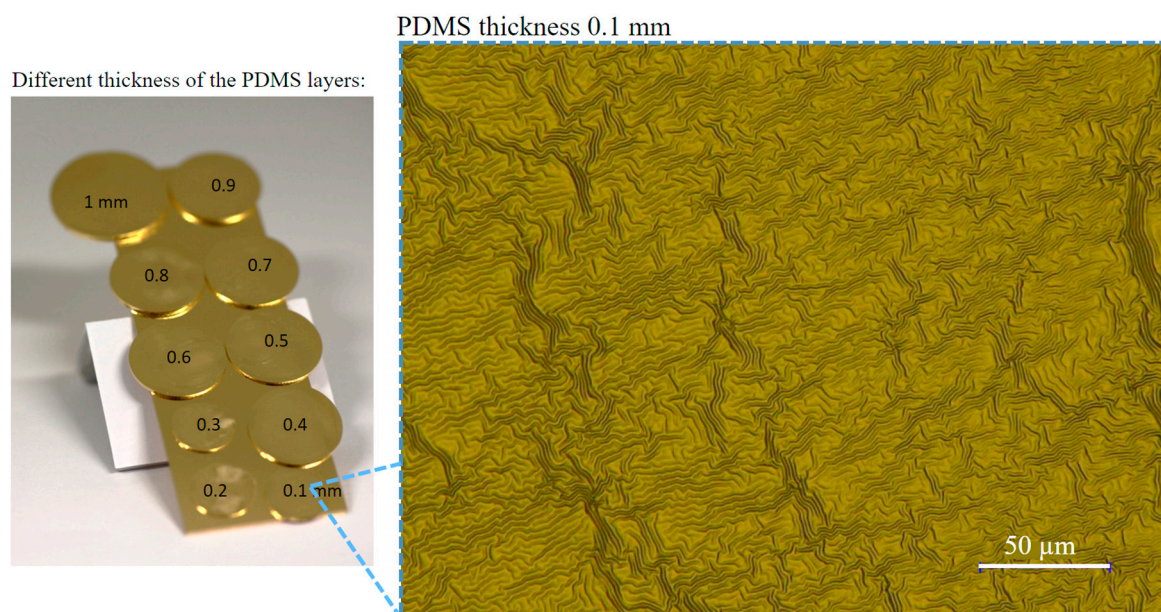

**Figure S8.** – Photograph of the sputtered Cr/Au on 10:1 PDMS test layers with a thickness range from 1 mm to 0.1 mm. The magnified surface view of the 0.1 mm thick PDMS with metal is on the right side. The wrinkle behavior is identical on all samples sputtered without shadow mask.

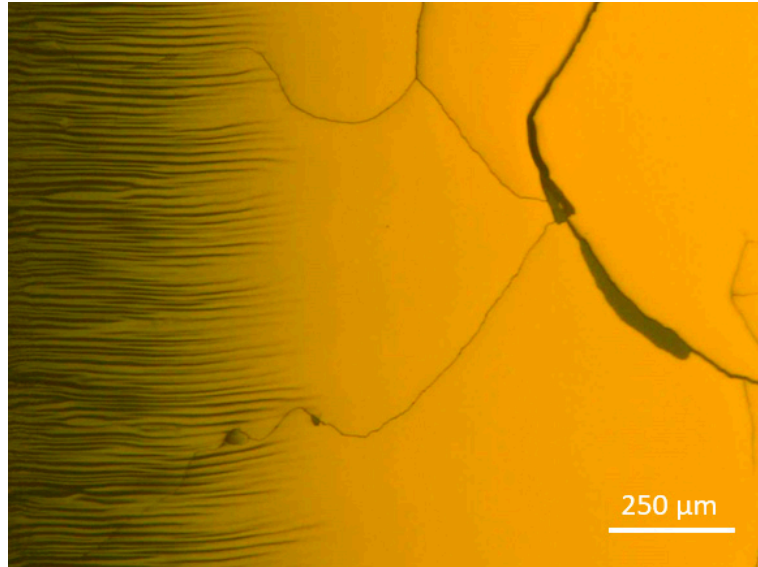

**Figure S9.** – Optical microscope image of the Cr/Au meander surface. Substrate is 20  $\mu\text{m}$  thick free-standing 10:4 PDMS membrane. Hard PDMS has clearly seen planar and wrinkled areas. The  $\mu$ -size cracks “self-heal” on the wrinkled region.

**Table S1.** – Detailed parameters of the Thermo-electric Meander-shaped elements on a thin freestanding PDMS membranes

| Sample | Meander length, mm | Mixing ratio (PDMS base:curing agent) | PDMS film thickness*, $\mu\text{m}$ | Resistance calculated, Ohm | Resistance measured, Ohm | Wrinkles wavelength, $\mu\text{m}$ |
|--------|--------------------|---------------------------------------|-------------------------------------|----------------------------|--------------------------|------------------------------------|
| 1      | 29                 | 10:1                                  | 20.4                                | 3.46                       | 10.8                     | 5.1                                |
| 2      | 48                 | 10:1                                  | 20.37                               | 5.73                       | 13.5                     | 5.07                               |
| 3      | 29                 | 10:1                                  | 40.09                               | 3.46                       | 11                       | 5.05                               |
| 4      | 48                 | 10:1                                  | 40.12                               | 5.73                       | 14                       | 5.08                               |
| 7      | 29                 | 10:4                                  | 20.1                                | 3.46                       | 15.4                     | 5.33                               |
| 8      | 48                 | 10:4                                  | 20.2                                | 5.73                       | 20.5                     | 5.34                               |
| 9      | 29                 | 10:4                                  | 40.51                               | 3.46                       | 15.42                    | 5.34                               |
| 10     | 48                 | 10:4                                  | 40.4                                | 5.73                       | 20.7                     | 5.36                               |

\* PDMS layer thickness was measured at three places per sample, and the average value is presented in the table

**Table S2.** – PDMS thickness distribution within the membrane area, where P1 is a measurement in the center, P3 near the edge and P2 in between P1 and P3.

| <b>Sample</b>                                 | <b>P1, <math>\mu\text{m}</math></b> | <b>P2, <math>\mu\text{m}</math></b> | <b>P3, <math>\mu\text{m}</math></b> | <b>Average, <math>\mu\text{m}</math></b> |
|-----------------------------------------------|-------------------------------------|-------------------------------------|-------------------------------------|------------------------------------------|
| 20 $\mu\text{m}$ PDMS 10:1 with short meander | 20,3                                | 20,4                                | 20,5                                | 20,4                                     |
| 20 $\mu\text{m}$ PDMS 10:1 with long meander  | 20,34                               | 20,37                               | 20,4                                | 20,37                                    |
| 40 $\mu\text{m}$ PDMS 10:1 with short meander | 40,08                               | 40,09                               | 40,11                               | 40,09                                    |
| 40 $\mu\text{m}$ PDMS 10:1 with long meander  | 40,11                               | 40,12                               | 40,14                               | 40,12                                    |
| 20 $\mu\text{m}$ PDMS 10:4 with short meander | 40,38                               | 40,45                               | 40,7                                | 40,51                                    |
| 20 $\mu\text{m}$ PDMS 10:4 with long meander  | 40,29                               | 40,31                               | 40,6                                | 40,4                                     |
| 40 $\mu\text{m}$ PDMS 10:4 with short meander | 19,9                                | 20,1                                | 20,3                                | 20,1                                     |
| 40 $\mu\text{m}$ PDMS 10:4 with long meander  | 20                                  | 20,2                                | 20,4                                | 20,2                                     |

**Table S3.** – Resistance and wavelengths of the wrinkles, for the 40  $\mu\text{m}$  thick PDMS membrane with 29 mm meander, after multiple on/off cycles. The intermediate time is 5 minutes.

| <b>I, A</b> | <b>R<sub>10</sub>, <math>\Omega</math></b> | <b><math>\lambda_{10}</math>, <math>\mu\text{m}</math></b> | <b>R<sub>20</sub>, <math>\Omega</math></b> | <b><math>\lambda_{20}</math>, <math>\mu\text{m}</math></b> | <b>R<sub>30</sub>, <math>\Omega</math></b> | <b><math>\lambda_{30}</math>, <math>\mu\text{m}</math></b> | <b>R<sub>40</sub>, <math>\Omega</math></b> | <b><math>\lambda_{40}</math>, <math>\mu\text{m}</math></b> | <b>R<sub>50</sub>, <math>\Omega</math></b> | <b><math>\lambda_{50}</math>, <math>\mu\text{m}</math></b> | <b>R<sub>60</sub>, <math>\Omega</math></b> | <b><math>\lambda_{60}</math>, <math>\mu\text{m}</math></b> |
|-------------|--------------------------------------------|------------------------------------------------------------|--------------------------------------------|------------------------------------------------------------|--------------------------------------------|------------------------------------------------------------|--------------------------------------------|------------------------------------------------------------|--------------------------------------------|------------------------------------------------------------|--------------------------------------------|------------------------------------------------------------|
| 0           | 11                                         | 5.05                                                       | 11                                         | 5.05                                                       | 11                                         | 5.05                                                       | 11                                         | 5.05                                                       | 11                                         | 5.05                                                       | 11                                         | 5.05                                                       |
| 0.18        | 12.76                                      | 5.26                                                       | 12.7                                       | 5.39                                                       | 12.76                                      | 5.31                                                       | 12.66                                      | 5.3                                                        | 12.73                                      | 5.24                                                       | 12.73                                      | 5.39                                                       |
